# Supplementary material for: The use of differential scanning fluorimetry in the rational design of plastic antibodies for protein targets
Source: Royal Society of Chemistry journal article supplement (doi:10.1039/c6an01155a), 2016-01-01
Supplement: c6an01155a1.pdf [file c6an01155a1.pdf]

## The use of Differential Scanning Fluorimetry in the Rational Design of Plastic Antibodies for Protein Targets

Jon Ashley,<sup>a</sup> Yunus Shukor<sup>b</sup> and Ibtisam E. Tothill<sup>a\*</sup>

---

<sup>a</sup> Cranfield University, College Road, Cranfield, Bedfordshire MK43 0AL, England, UK

<sup>b</sup> Dept. of Biochemistry, Faculty of Biotechnology and Biomolecular Sciences, Universiti Putra Malaysia, 43400 UPM Serdang, Selangor, Malaysia.  
Corresponding Author; [i.tothill@cranfield.ac.uk](mailto:i.tothill@cranfield.ac.uk)

### Supporting Information

**Determination of the apparent molarities:** Apparent Molarities by weighing freeze dried 10 ml aliquots of purified MIP-NPs and calculated using Equation S1 where  $N_A$  is Avogadro's constant,  $d$  is the hydrodynamic diameter (nm) determined from DLS,  $\rho$  is the density of the nanoparticles ( $\text{g cm}^{-3}$ ) and  $X$  is the weight concentration ( $\text{g ml}^{-1}$ ). The density of the nanoparticles is assumed to be  $0.08 \text{ g cm}^{-3}$ .

$$[\text{NPs}] = \frac{6}{\pi N_A d^3 \rho} X$$

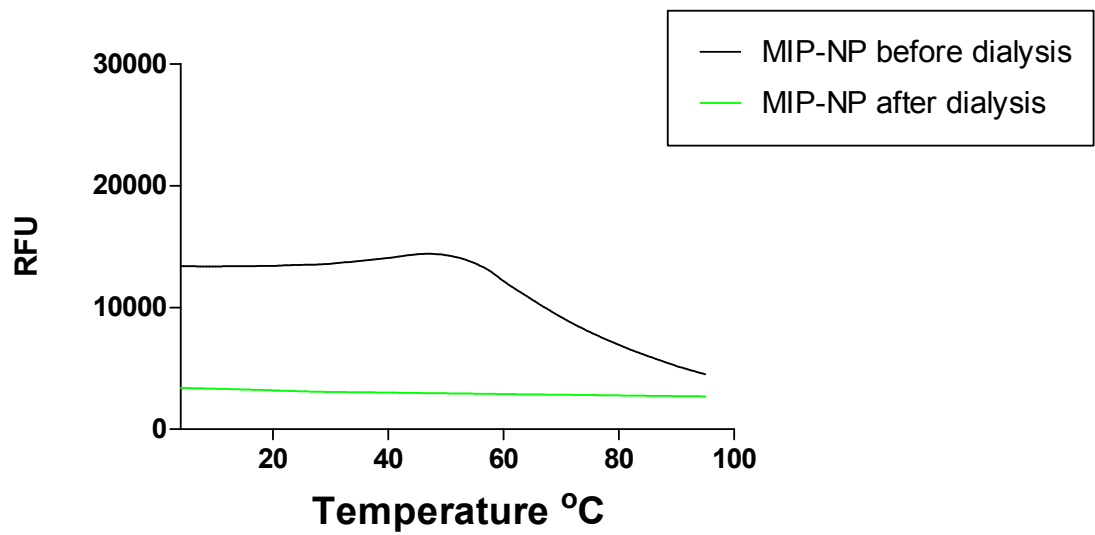

**Figure S1.** Melting profiles of the scaled up MIP-NP synthesis mixture before and after dialysis.

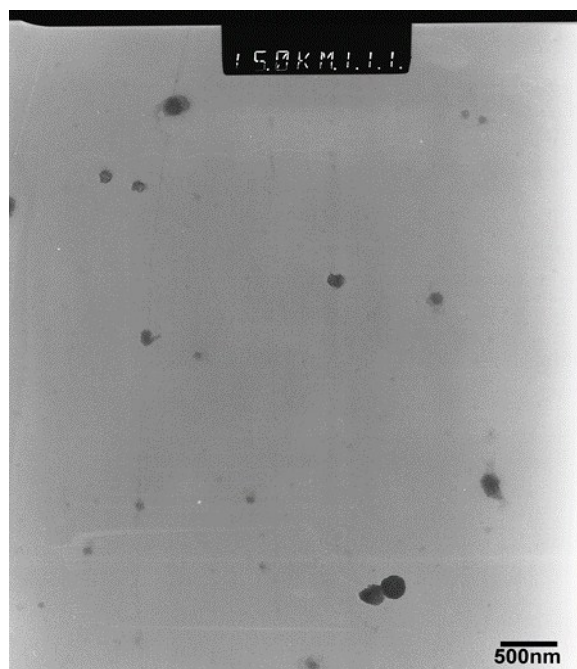

**Figure S2.** Representative TEM image of NIP-NP

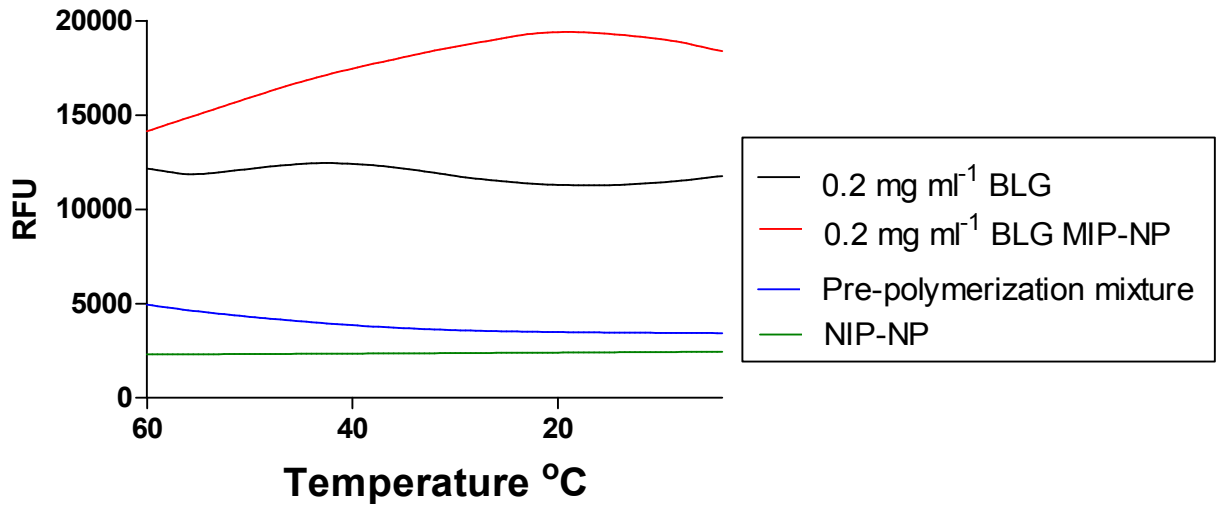

**Figure S3.** Reverse cooling binding assay melting profile of the native protein, MIP-NP: protein complex, pre-polymerisation mixture and NIP-NP. The fluorescence signal was measured at - 0.5 °C increments every 30 seconds from 60 °C down to 4 °C.
